# Supplementary material for: Green and efficient method for the realization of full-component recovery of LiFePO4 black powder
Source: Royal Society of Chemistry journal article supplement (doi:10.1039/d4gc01444h), 2024-01-01
Supplement: d4gc01444h1.pdf [file d4gc01444h1.pdf]

## Supporting information

# Green and efficient method for realization of full-component recovery of $\text{LiFePO}_4$ black powder

Mai Gao, Fangfang Sun, Wenxiu Peng, Wenbin Dai, Zaiwu Zhang, Lei Zhang, Hongzhou Zhang, Yue Ma, Lianqi Zhang, Dawei Song

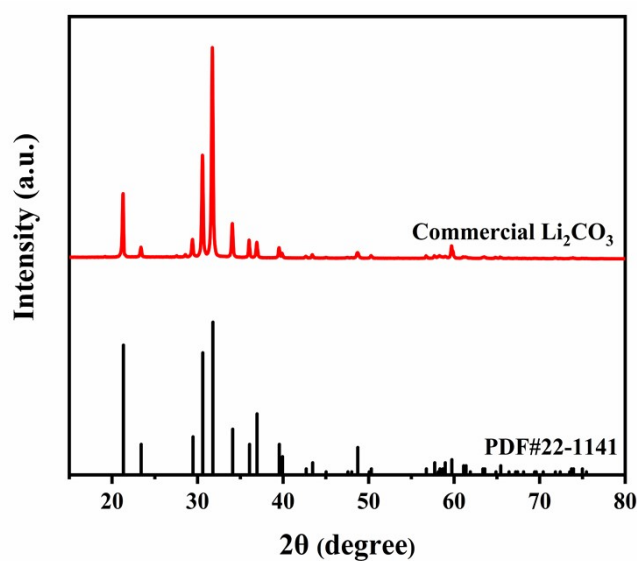

Fig. S1 XRD pattern of commercial  $\text{Li}_2\text{CO}_3$ .

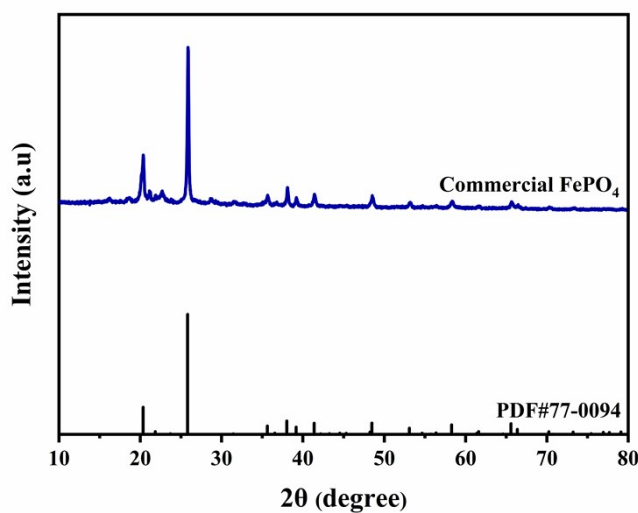

Fig. S2 XRD pattern of commercial  $\text{FePO}_4$ .

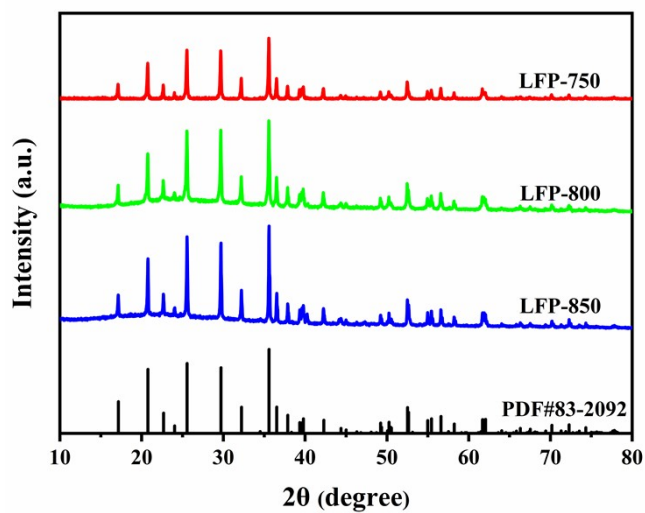

Fig. S3 XRD patterns of  $\text{LiFePO}_4$  materials synthesized at different temperature.

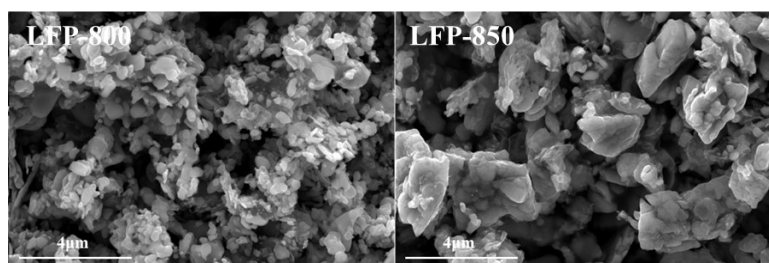

Fig. S4 SEM images of  $\text{LiFePO}_4$  materials synthesized at different temperature.

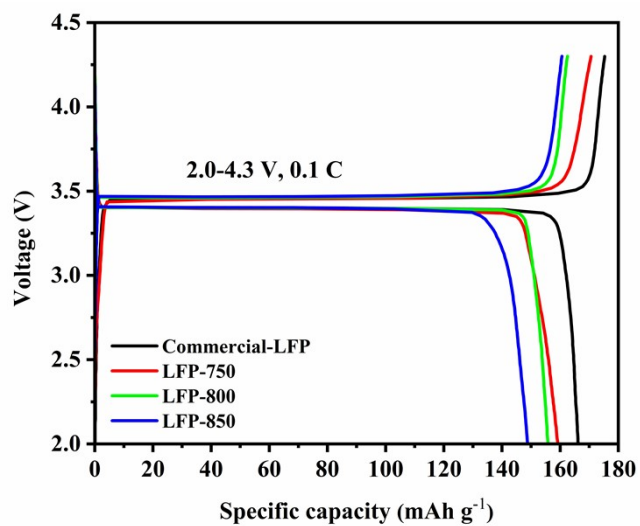

Fig. S5  $\text{LiFePO}_4$  cathodes synthesized at different temperature at 0.1 C.

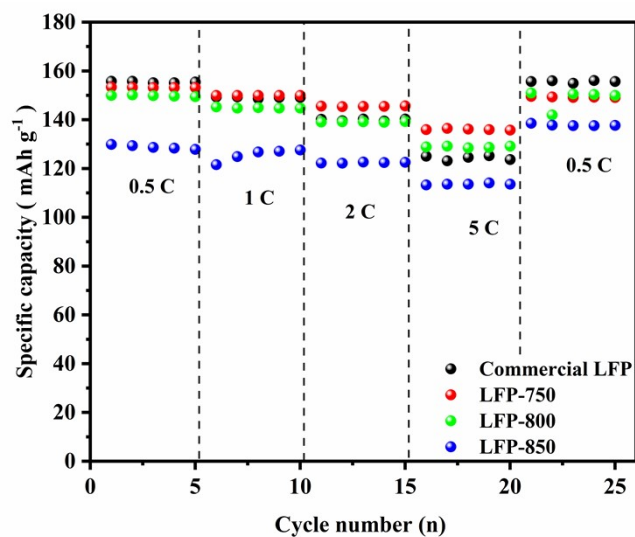

Fig. S6 Rate performance of LiFePO<sub>4</sub> cathodes synthesized at different temperature.

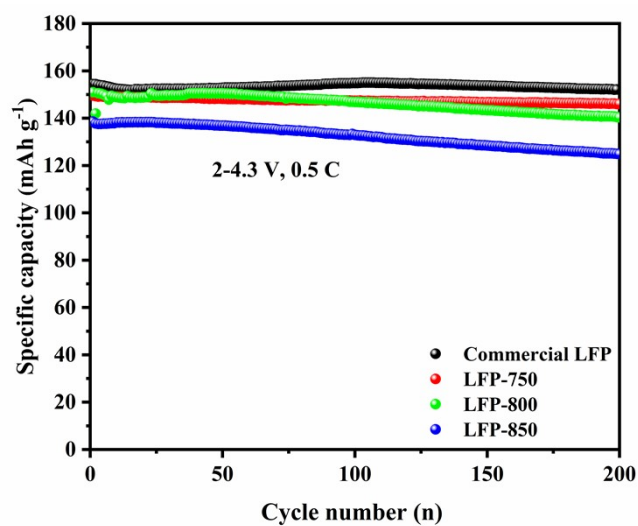

Fig. S7 Cycle performance curves of LiFePO<sub>4</sub> cathodes synthesized at different temperature.

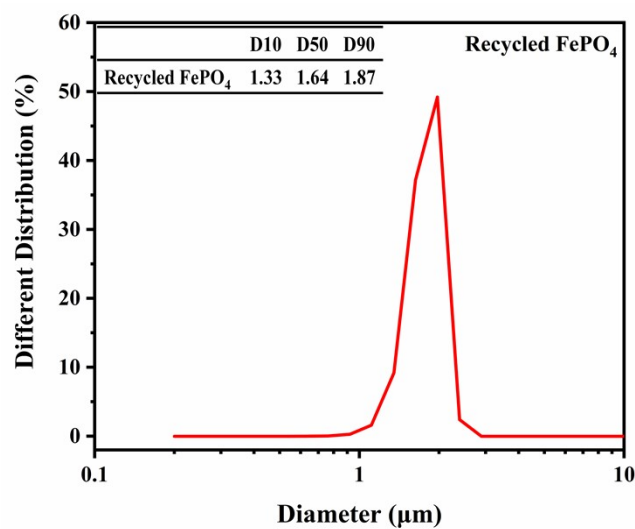

Fig. S8 Size distribution curve of recycled FePO<sub>4</sub>.

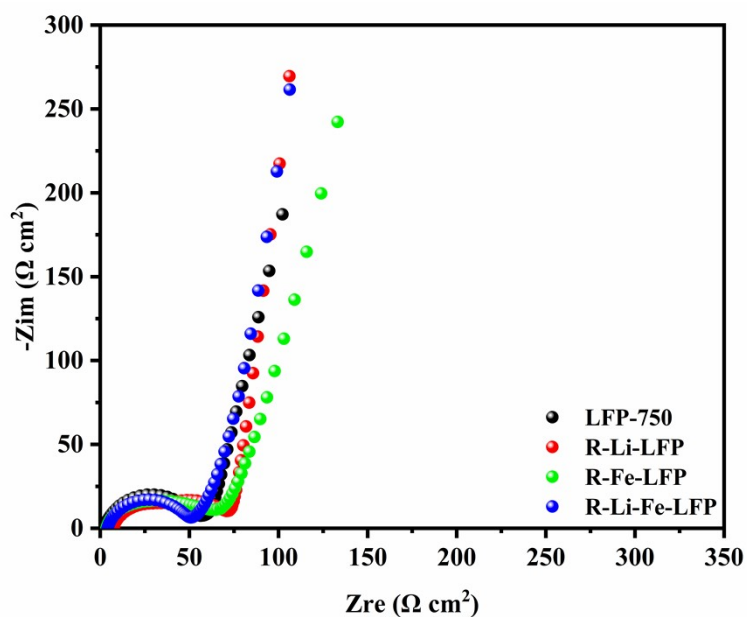

Fig. S9 Electrochemical impedance mapping of LiFePO<sub>4</sub> cathodes.

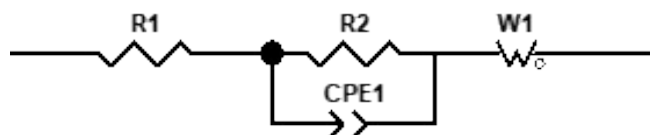

Fig. S10 Equivalent circuit diagram.

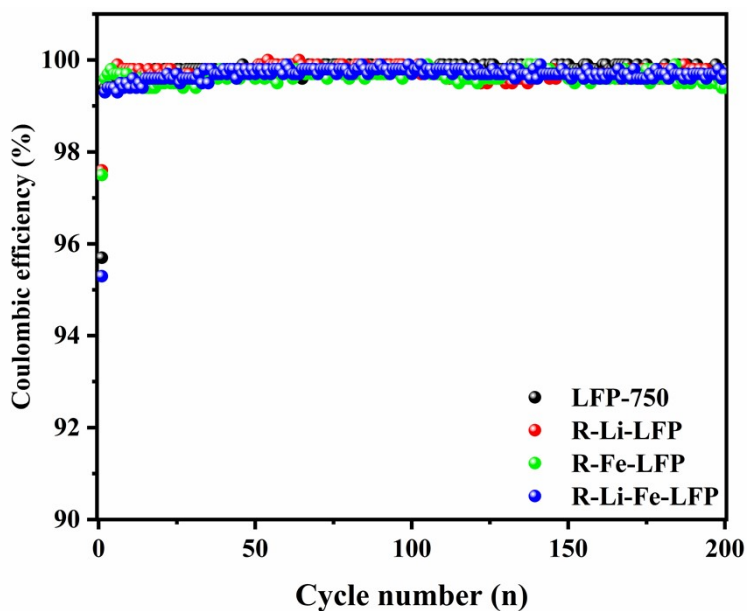

Fig. S11 Coulombic efficiencies of LiFePO<sub>4</sub> cathodes at 0.5 C.

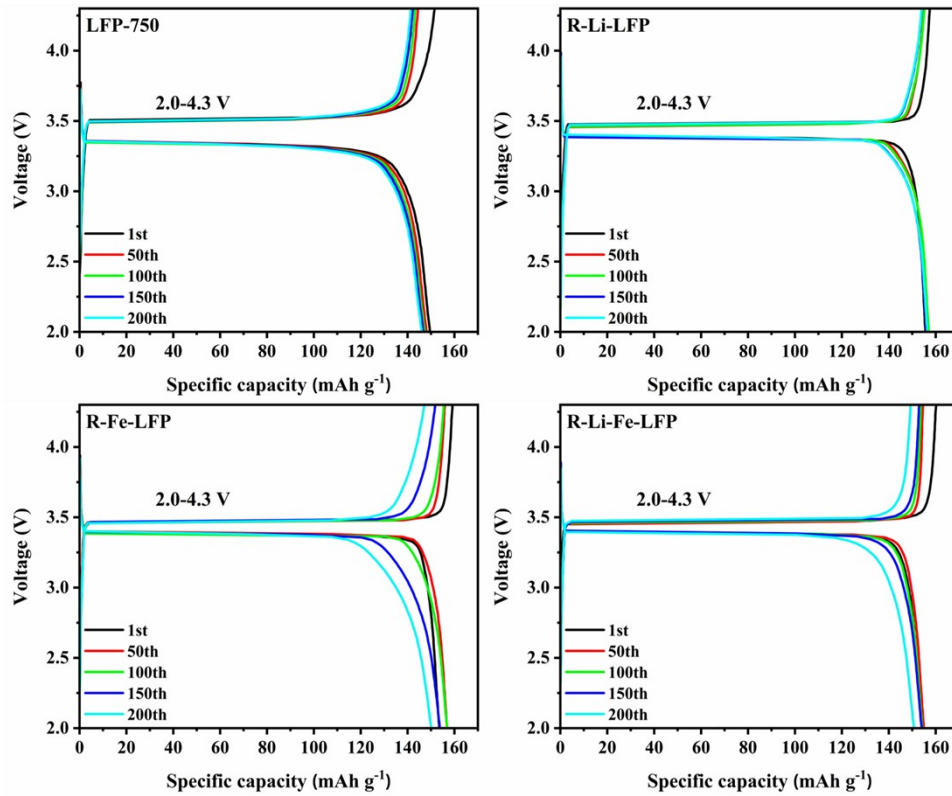

Fig. S12 Charging and discharging curves for different cycles.

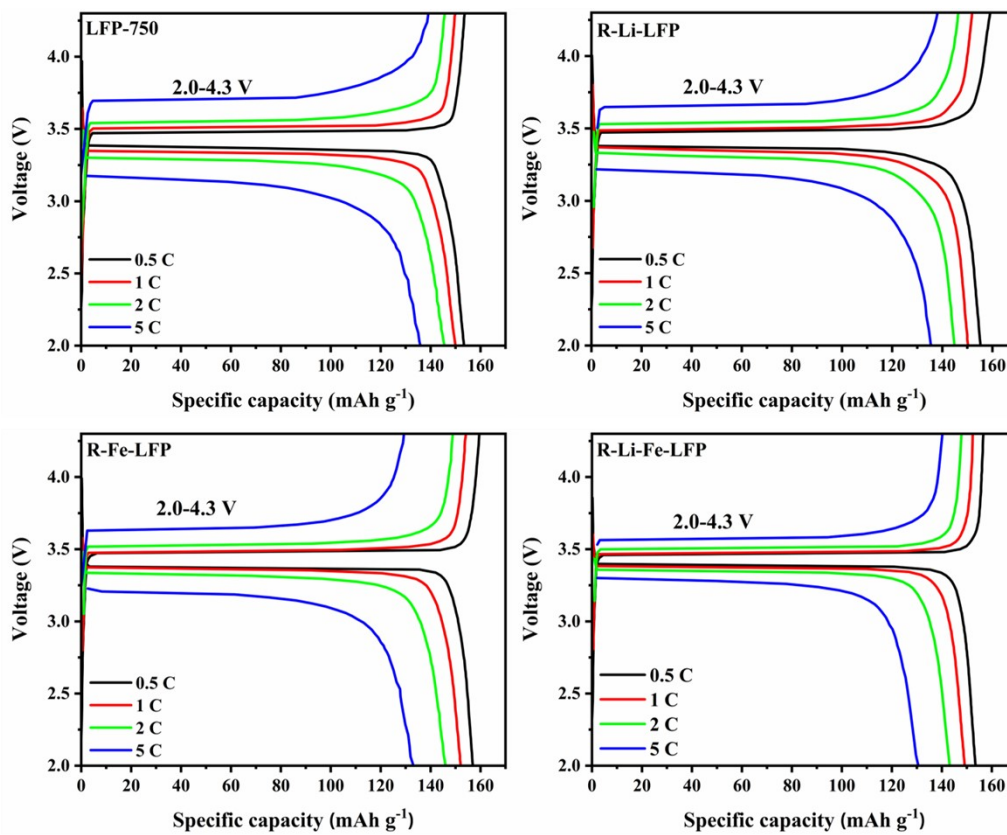

Fig. S13 Charge discharge curves at different rates.

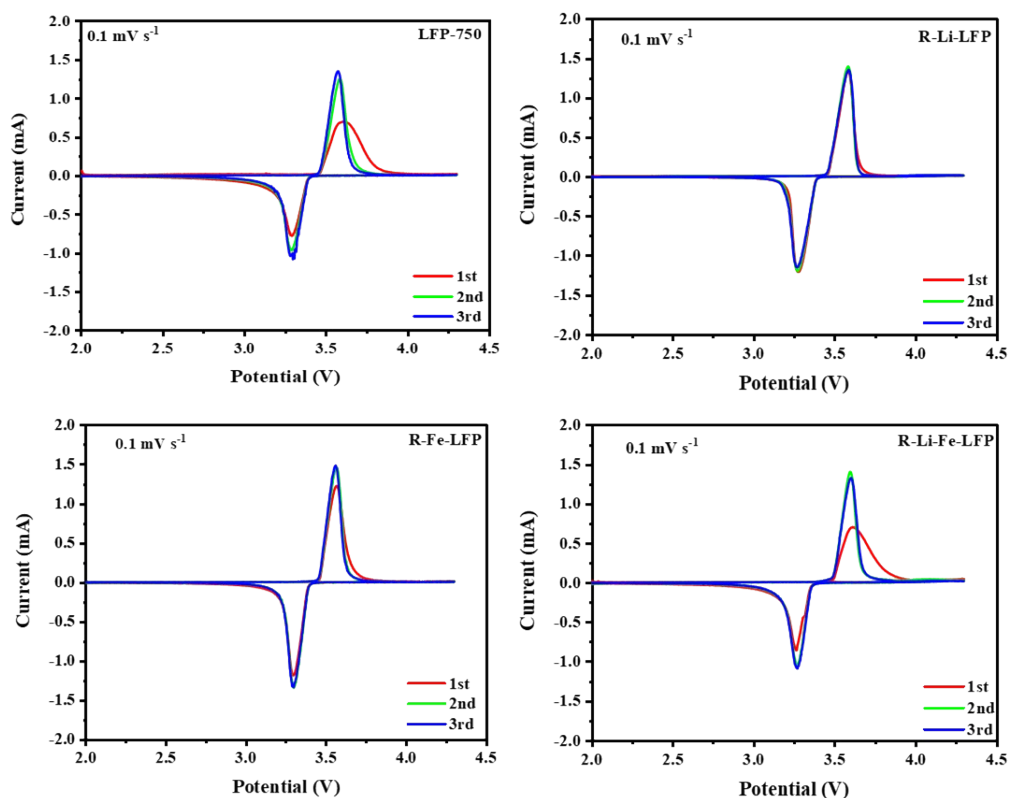

Fig. S14 CV curves of LiFePO<sub>4</sub> cathodes.

Table S1 ICP element composition of the recycled Li<sub>2</sub>CO<sub>3</sub>.

| Element | Li <sub>2</sub> CO <sub>3</sub> | P    | Na   | Ca   | Fe, Al |
|---------|---------------------------------|------|------|------|--------|
| wt.%    | >99.4                           | 0.11 | 0.13 | 0.03 | <0.01  |

Table S2 Tap densities of LiFePO<sub>4</sub> materials.

| LiFePO <sub>4</sub> materials | Tap density (g cm <sup>-3</sup> ) |
|-------------------------------|-----------------------------------|
| LFP-750                       | 1.02                              |
| R-Li-LFP                      | 1.02                              |
| R-Fe-LFP                      | 1.03                              |
| R-Li-Fe-LFP                   | 1.06                              |

**Table S3 Area loading of active substances in LiFePO<sub>4</sub> cathodes.**

| <b>LiFePO<sub>4</sub> cathodes</b> | <b>Area loading of active substances (mg cm<sup>-2</sup>)</b> |
|------------------------------------|---------------------------------------------------------------|
| LFP-750                            | 2.33                                                          |
| R-Li-LFP                           | 2.35                                                          |
| R-Fe-LFP                           | 2.39                                                          |
| R-Li-Fe-LFP                        | 2.43                                                          |

**Table S4 Initial coulombic efficiencies of LiFePO<sub>4</sub> cathodes.**

| <b>LiFePO<sub>4</sub> cathodes</b> | <b>Coulombic efficiency (%)</b> |
|------------------------------------|---------------------------------|
| LFP-750                            | 95.7                            |
| R-Li-LFP                           | 97.6                            |
| R-Fe-LFP                           | 97.5                            |
| R-Li-Fe-LFP                        | 95.3                            |
